# Supplementary material for: Salt-templated porous carbon–carbon composite electrodes for application in vanadium redox flow batteries
Source: Royal Society of Chemistry journal article supplement (doi:10.1039/c7ta07759a), 2017-01-01
Supplement: c7ta07759a1.pdf [file c7ta07759a1.pdf]

## Supporting Information

### Salt-templated porous carbon-carbon composite electrodes for application in vanadium redox flow batteries

Maike Schnucklake<sup>a</sup>, Sophie Kuecken<sup>b</sup>, Abdulmonem Fetyan<sup>a</sup>, Johannes Schmidt<sup>b</sup>,  
Arne Thomas<sup>b</sup>, Christina Roth<sup>a\*</sup>

<sup>a</sup>Institute of Chemistry and Biochemistry, Freie Universität Berlin, Takustraße 3, D-14195 Berlin, Germany.

<sup>b</sup>Institute of Chemistry, Technische Universität Berlin, Hardenbergstr. 40, D-10623 Berlin, Germany.

S1. Pore size distribution

S2. X-ray diffraction analysis

S3. Energy-dispersive X-ray spectroscopy

S4. TGA measurement

#### S1. Pore size distribution

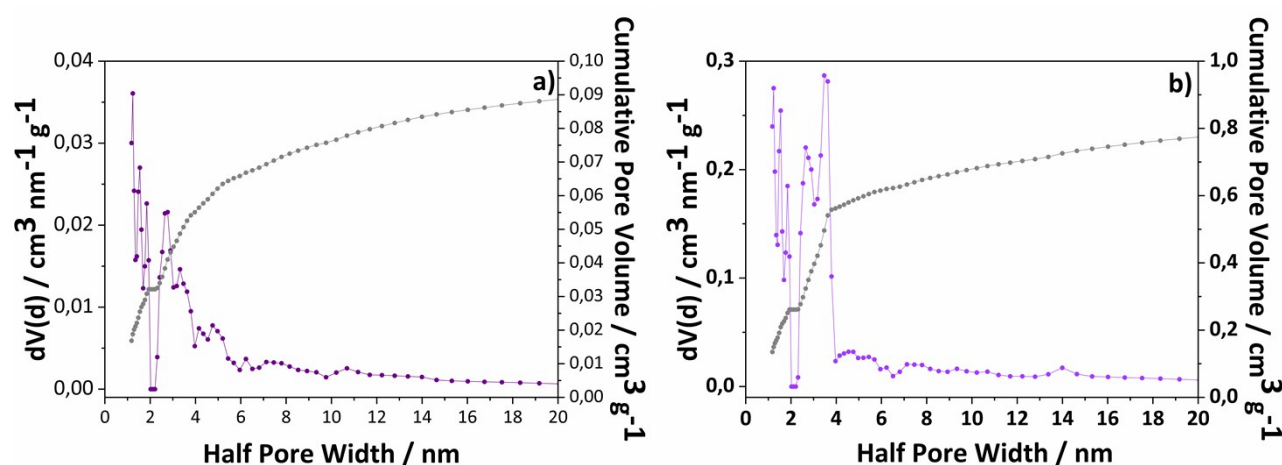

Figure S 1: Pore size distributions of the composite electrode (a) and the bulk material (b).

## S2. X-ray diffraction analysis

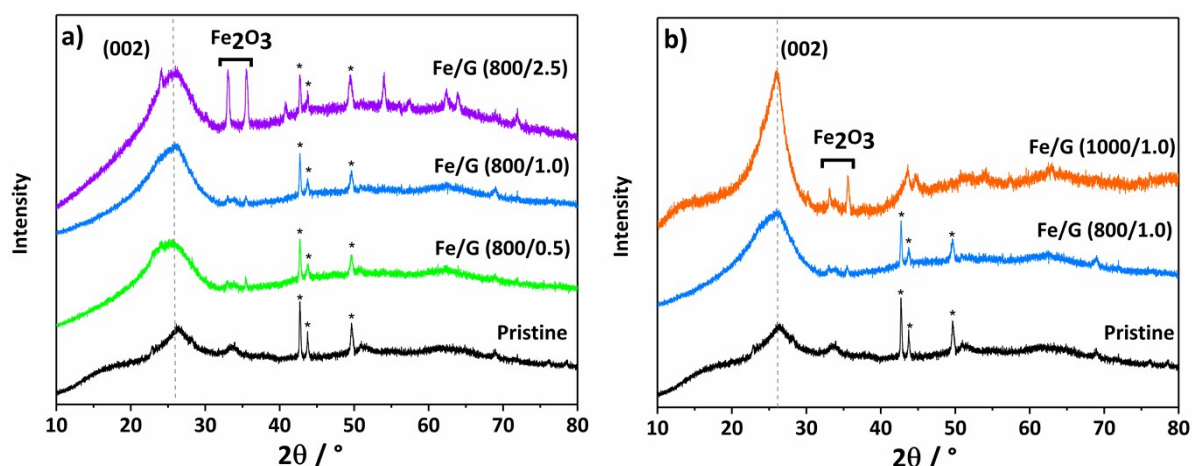

Figure S 2: X-ray diffraction patterns for carbon felts a) graphitized at 800 °C with different weight percentages of catalytic iron and b) graphitized at different temperatures. Reflections marked with a star are assigned to a damaged scatter and do not belong to the carbon material.

The pristine and the treated carbon felts exhibit a characteristic reflection at  $2\theta = 25.5^\circ$ , corresponding to the C(002) reflection, attributed to the interlayer stacking of graphitic planes. A temperature of 800 °C is not high enough to initiate significant graphitization, as indicated by the not distinctive and rather broad reflection. However, with higher iron content the C(002) reflection increases slightly in intensity (Figure S 2a). Additional reflections at  $2\theta = 33.2^\circ$  and  $35.6^\circ$  can be attributed to residual iron oxide ( $\text{Fe}_2\text{O}_3$ ) in the felts still present after washing, when higher weight percentages of iron were used. Remaining iron oxide is also recognized as a shoulder at the (002) reflections. From Figure S 2b it can be seen that for graphitizing temperatures of 1000 °C the relative intensity of the C(002) reflection increases visibly while the reflection width decreases.

## S3. Energy-dispersive X-ray spectroscopy

Table S1: Elemental composition of the composite electrode based on Energy-dispersive X-ray spectroscopy.

| Element | Atom percentage |
|---------|-----------------|
| C       | 89.6            |
| N       | 4.5             |
| O       | 3.2             |
| Na      | 0.4             |
| Cl      | 1.3             |
| Zn      | 0.8             |

#### S4. TGA measurement

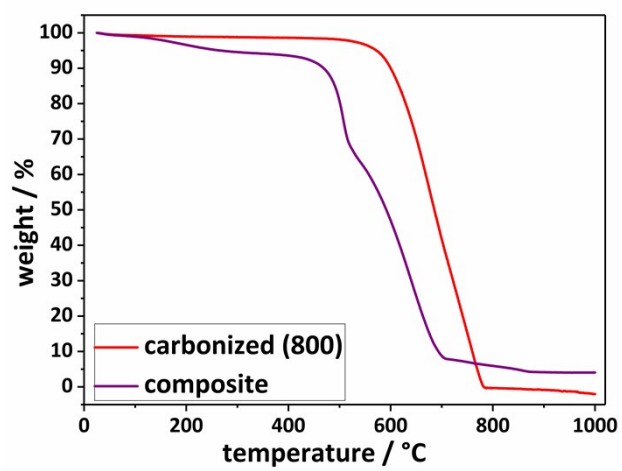

Figure S 3: TGA measurements of the composite electrode and the carbonized felt.
